# Supplementary material for: Integrating catalytic fractionation and microbial funneling to produce 2-pyrone-4,6-dicarboxylic acid and ethanol
Source: Royal Society of Chemistry journal article supplement (doi:10.1039/d5gc03986j), 2025-11-04
Supplement: d5gc03986j1.pdf [file d5gc03986j1.pdf]

## Supporting Information

### Integrating Catalytic Fractionation and Microbial Funneling to produce 2-Pyrone-4,6-Dicarboxylic Acid and Ethanol

Canan Sener,<sup>\*,†,a,b</sup> Emmanuel A. Aboagye,<sup>†,c</sup> Steven D. Karlen,<sup>a,b</sup> Jose M. Perez,<sup>a,b,d</sup> German E. Umana,<sup>a,b,d</sup>  
Yaoping Zhang,<sup>‡,a,b</sup> José Serate,<sup>a,b</sup> Timothy J. Donohue,<sup>a,b,e</sup> Daniel R. Noguera,<sup>a,b,d</sup> Christos T. Maravelias<sup>c,f</sup>

#### Table of Supplemental Data

##### Biological Funneling

###### Microbial funneling of RCF-oil to PDC

Fig. S1

Table S1

###### Microbial funneling RCF-pulp hydrolysate to ethanol

Fig. S1

Table S1

##### Process Synthesis

###### ASPEN PLUS model

Fig. S3

Fig. S4

###### Economic parameters and assumptions

Table S3

Table S4

Table S5

Table S6

## Biological Conversion

### Microbial funneling of RCF-oil to PDC

Growth curves for microbial funneling of RCF-products by the PDC producing strain of *N. aromaticivorans*.

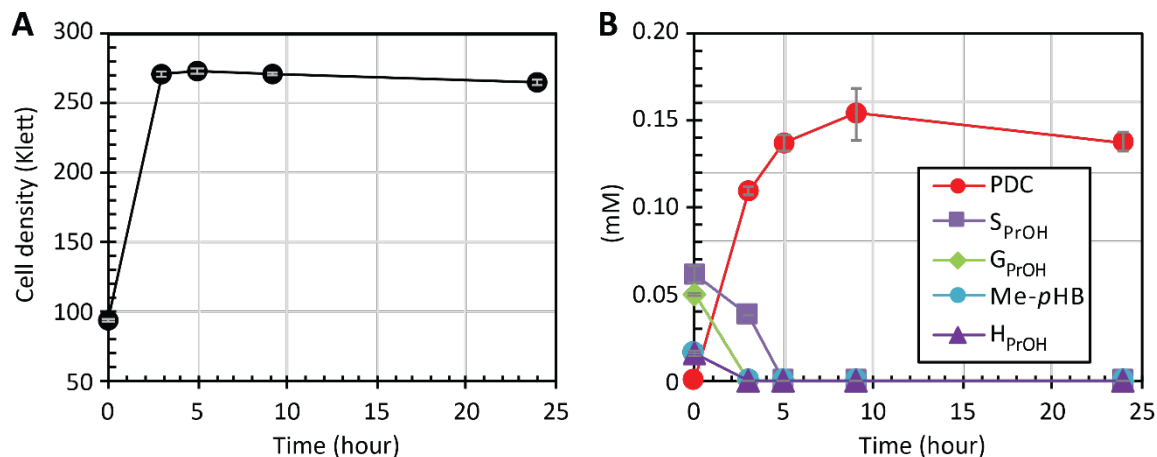

**Fig. S1.** (A) Cell density and (B) extracellular metabolite concentration of cultures supplemented with hydrogenolysis mixture obtained by catalytic hydrogenolysis of poplar.

**Table S1.** HPLC-MS experimental results for RCF-oil to PDC conversion.

| Experiment | PDC (mM)  | mmol PDC / L RCF-oil in solvent | g PDC / L RCF-oil in solvent | g PDC / Kg Poplar | Yield (% w/w) |
|------------|-----------|---------------------------------|------------------------------|-------------------|---------------|
| Run 1      | 0.138     | 13.8                            | 2.5                          | 55.2              | 5.5%          |
| Run 2      | 0.16      | 15.8                            | 2.9                          | 63.4              | 6.3%          |
| Run 3      | 0.14      | 14.2                            | 2.6                          | 56.8              | 5.7%          |
| Average    | 0.15±0.01 | 14.6±0.9                        | 2.68±0.16                    | 58.5±3.5          | 5.8%±0.4%     |

### Microbial funneling RCF-pulp hydrolysate to ethanol

Growth curves for *S. cerevisiae* GLBRCY945<sup>23</sup> growing on hydrolysate produced from RCF-pulp.

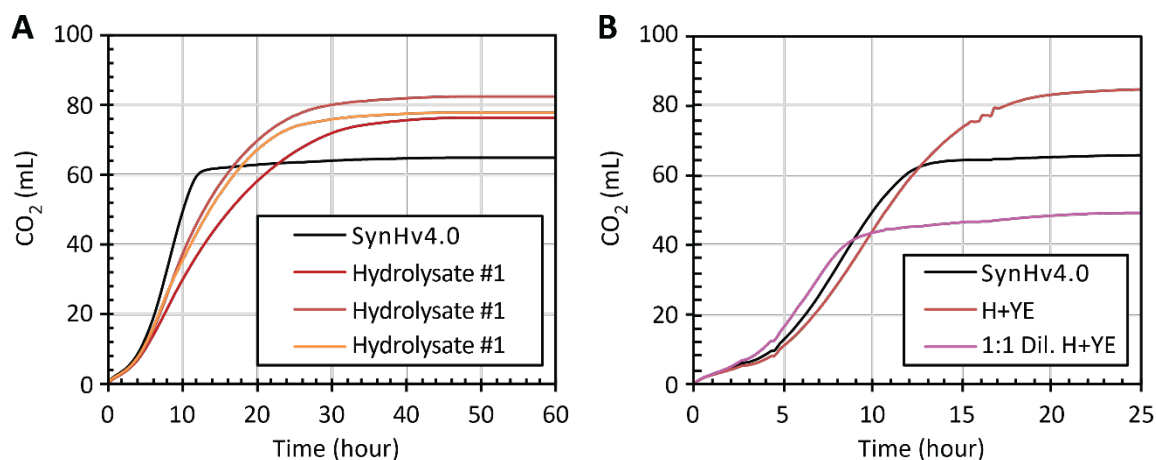

**Fig. S2.** Respirometer fermentation of yeast Y945 in Pd/C-pretreated poplar hydrolysate (A) without yeast extract, (B) Pd/C-pretreated poplar hydrolysate with yeast extract 10 g/L yeast extract (H+YE) and with the hydrolysate diluted 1:1 (v/v) with water and 5 g/L yeast extract (1:1 Dil. H+YE).

**Table S2.** HPLC-RID experimental results for RCF-pulp hydrolysate sugar composition and product composition after fermentation.

| Compound         | RCF-pulp hydrolysate | Synthetic hydrolysate v4.0 | RCF-pulp spent liquor #1 | RCF-pulp spent liquor #3 | RCF-pulp spent liquor #3 |
|------------------|----------------------|----------------------------|--------------------------|--------------------------|--------------------------|
| Ethanol (g/L)    | N/D                  | 40.4                       | 61.7                     | 63.4                     | 62.0                     |
| Glucose (g/L)    | 100.38               | N/D                        | N/D                      | N/D                      | N/D                      |
| Xylose (g/L)     | 42.46                | 19.9                       | 15.3                     | 18.2                     | 13.2                     |
| Cellobiose (g/L) | 6.27                 | N/D                        | 3.2                      | 4.0                      | 2.8                      |
| Glycerol (g/L)   | 0.2                  | 3.3                        | 4.2                      | 3.9                      | 4.2                      |
| Acetate (g/L)    | N/D                  | 3.9                        | 0.3                      | 0.2                      | 0.3                      |

N/D = Not detected

## Process Synthesis

### ASPEN PLUS mode

Fig. S3 shows the process configuration of the RCF and MNP blocks simulated in ASPEN PLUS. The processing capacity of the biorefinery is 2000 metric tons of dry biomass per day, consistent with NREL designs. Biomass, hydrogen, and methanol are fed into RCF reactor (RCFR). After hydrogenolysis of the biomass in the reactors, a series of flash tanks (FLH1,2,3) are used to separate most of the excess methanol and hydrogen, and water from the biomass from the mixture. The remaining mixture is sent to a centrifuge (CNF) where the carbohydrate pulp is separated and sent for hydrolysis. The liquid stream consisting primarily of monomer, oligomer, and methanol, is sent for distillation (DST1), where the distillate stream containing monomer is cooled (CLR1) and sent for PDC production. The vapor streams from the flash tanks are sent to are sent to another two-stage flash tanks where the first is used to separate hydrogen (FLH4) while the second is used to reduce the methanol content further (FLH5) before the remaining stream is distilled (DST2) to separate the remaining methanol and water. The bottoms stream containing the wastewater is sent for treatment. The distillate stream consisting of methanol is combined with fresh methanol, and other methanol streams. The pressure of the methanol stream pressure is increased using a pump and preheated using the vapor streams from the flash tanks by heat exchangers (HX1,2,3) and finally heated to meet RCF reactor conditions. The hydrogen stream is compressed (CPR) using a multi-stage compressor equipped with electric heaters to meet reactor conditions.

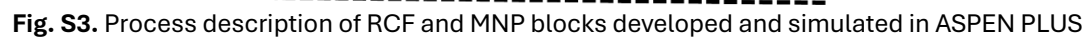

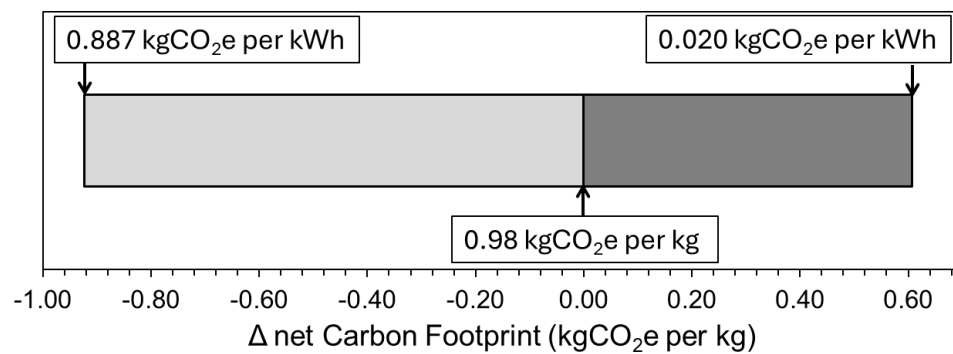

**Fig. S4.** Sensitivity analysis showing impact of grid emission factor on net carbon footprint

### Economic parameters and assumptions

Table S3 indicates the biomass (poplar) feedstock composition on dry basis, and the corresponding moisture content. Table S4 gives the detailed capital and operating cost for the base case biorefinery. Table S5 gives the economic parameters, and the economic assumptions used for the analysis, while Table S6 gives the emissions factors.

**Table S3.** Feedstock composition

| Component   | Weight % (dry basis) |
|-------------|----------------------|
| Glucan      | 46.6%                |
| Xylan       | 16.2%                |
| Arabinan    | 0.6%                 |
| Mannan      | 2.9%                 |
| Galactan    | 0.8%                 |
| Sucrose     | 0.5%                 |
| Acetate     | 4.3%                 |
| Extractives | 3.6%                 |
| Lignin      | 24.2%                |
| Ash         | 0.3%                 |
| Total       | 100%                 |
| Moisture    | 17%                  |

**Table S4.** Summary of capital and operating expenditure for base case (all values in 2024\$)

| Capital Costs                                 |                 |
|-----------------------------------------------|-----------------|
| Reductive Catalytic Fractionation (RCF)       | \$463,127,397   |
| Hydrolysis (HYD, Including Enzyme Production) | \$21,583,784    |
| Fermentation (FERM)                           | \$12,808,794    |
| Ethanol Separation & Storage (SEP)            | \$12,595,635    |
| Wastewater Treatment (WWT)                    | \$66,685,271    |
| Combined Heat and Power Generation (CHP)      | \$110,185,780   |
| Monomer Purification (MNP)                    | \$7,579,711     |
| PDC Production (PDCP)                         | \$33,406,892    |
| PDC Isolation (PDCI)                          | \$8,169,016     |
| Total Installed Equipment Cost                | \$736,142,281   |
| Added Direct + Indirect Costs                 | \$718,850,582   |
| (% of TCI)                                    | 49%             |
| Total Capital Investment (TCI)                | \$1,454,992,863 |
| Capital Recovery Charge                       | 0.347           |
| Manufacturing Costs (\$/yr)                   |                 |
| Feedstock                                     | \$75,516,342    |
| Make-up Solvent + Hydrogen                    | \$24,021,422    |
| Catalyst                                      | \$931,978       |
| PDC Production Growth Media                   | \$54,355,250    |
| Glucose (Enzyme Production)                   | \$19,814,681    |
| Other Chemicals                               | \$4,838,629     |
| Net Electricity                               | -\$5,530,443    |
| Ethanol                                       | -\$59,883,443   |
| Fixed Costs                                   | \$94,049,538    |
| Capital Depreciation                          | \$46,131,580    |
| Average Income Tax                            | \$90,720,454    |
| Average Return on Investment                  | \$368,195,498   |



**Table S5.** List of economic parameters, and assumptions

|                                                                                                      |          |
|------------------------------------------------------------------------------------------------------|----------|
| Biomass (\$ per ton dry biomass) <sup>a</sup>                                                        | 114.95   |
| Methanol (\$ per ton) <sup>i</sup>                                                                   | 463.1    |
| Hydrogen (\$ per ton) <sup>e</sup>                                                                   | 1479.6   |
| Glucose (\$ per ton) <sup>e</sup>                                                                    | 1109.6   |
| Electricity (\$ per kWh) <sup>d</sup>                                                                | 0.0808   |
| Natural Gas (\$ per ton) <sup>e</sup>                                                                | 312.7    |
| Cooling Water (\$ per ton) <sup>j</sup>                                                              | 0.000299 |
| Disposal of ash (\$ per ton) <sup>g</sup>                                                            | 48.3     |
| Boiler chemicals (\$ per ton) <sup>g</sup>                                                           | 7582.6   |
| FGD lime (\$ per ton) <sup>g</sup>                                                                   | 302.7    |
| Fresh Water (\$ per ton) <sup>e</sup>                                                                | 0.65     |
| Disodium phosphate (\$ per ton) <sup>e</sup>                                                         | 497.5    |
| Monopotassium phosphate (\$ per ton) <sup>b</sup>                                                    | 1113.0   |
| Ammonium Sulfate (\$ per ton) <sup>h</sup>                                                           | 347.6    |
| NaCl (\$ per ton) <sup>k</sup>                                                                       | 124.9    |
| Corn steep liquor (\$ per ton) <sup>f</sup>                                                          | 103.4    |
| Caustic (\$ per ton) <sup>g</sup>                                                                    | 2108     |
| Investment Tax Credit <sup>l</sup>                                                                   | 30%      |
| Renewable Identification Number under Renewable Fuels Standard Program (\$ per gal EGE) <sup>m</sup> | 3.5      |
| Clean Fuels Production Credit (\$ per gal EGE) <sup>n</sup>                                          | 1        |
| Ethanol selling price (\$ per GGE) <sup>a</sup>                                                      | 2.50     |

  

|                                                                                                                                                                                                                                                                                                                                                                                                                                                                                                                                                                                                                                                                                                                                                                                                                                                                                                                                                                                                                                                                                                                                                                                                                                                                                                                                                                                                                                                                 |  |
|-----------------------------------------------------------------------------------------------------------------------------------------------------------------------------------------------------------------------------------------------------------------------------------------------------------------------------------------------------------------------------------------------------------------------------------------------------------------------------------------------------------------------------------------------------------------------------------------------------------------------------------------------------------------------------------------------------------------------------------------------------------------------------------------------------------------------------------------------------------------------------------------------------------------------------------------------------------------------------------------------------------------------------------------------------------------------------------------------------------------------------------------------------------------------------------------------------------------------------------------------------------------------------------------------------------------------------------------------------------------------------------------------------------------------------------------------------------------|--|
| <ul style="list-style-type: none"> <li>• All costs are indexed to 2024 dollars. Economic assumptions consistent with NREL reports<sup>16,24,25</sup></li> <li>• Internal rate of return (IRR) is assumed to be 30% to reflect the higher risk in investing in new technology<sup>5</sup></li> <li>• Capital investment is spread over three years at a rate of 8%, 60%, and 32% in the first, second, and third years, respectively</li> <li>• Working capital is 5% of fixed capital investment</li> <li>• Total direct cost (TDC) is 117.5% of installed cost (IC)</li> <li>• Total indirect cost (TIC) is 60% of TDC</li> <li>• Working capital is 5% of fixed capital investment (FCI = TCD + TIC)</li> <li>• Maintenance cost is 3% of IC</li> <li>• Total salaries and labor burden is 4.5% of FCI</li> <li>• Property insurance and tax is 0.7% of FCI</li> <li>• Equity financing is 40%</li> <li>• Loan term is 10 years with 8% interest rate</li> <li>• Federal income tax rate is 35%</li> <li>• State taxes are not considered primarily because tax rates vary from state to state (0% to 12%)</li> <li>• Start-up time is 6 months</li> <li>• Revenues, variable costs, and fixed costs during start-up (% of normal) are 50%, 75%, and 100% respectively</li> <li>• Depreciation for general and steam plants is 200% and 150% declining balance</li> <li>• General and steam plant recovery periods are 7 and 20 years respectively</li> </ul> |  |
|-----------------------------------------------------------------------------------------------------------------------------------------------------------------------------------------------------------------------------------------------------------------------------------------------------------------------------------------------------------------------------------------------------------------------------------------------------------------------------------------------------------------------------------------------------------------------------------------------------------------------------------------------------------------------------------------------------------------------------------------------------------------------------------------------------------------------------------------------------------------------------------------------------------------------------------------------------------------------------------------------------------------------------------------------------------------------------------------------------------------------------------------------------------------------------------------------------------------------------------------------------------------------------------------------------------------------------------------------------------------------------------------------------------------------------------------------------------------|--|

<sup>a</sup>Taken from Bartling *et al.*,<sup>10</sup> <sup>b</sup>Taken from Alibaba,<sup>26</sup> <sup>d</sup>Taken from EIA,<sup>27</sup> <sup>e</sup>Taken from NREL 2018,<sup>24</sup> <sup>f</sup>Taken from NREL 2011,<sup>16</sup> <sup>g</sup>Taken from NREL 2015,<sup>25</sup> <sup>h</sup>Taken from Intratec,<sup>28</sup> <sup>i</sup>Taken from Liao *et al.*,<sup>29</sup> <sup>j</sup>Estimated from Aspen Process Economic Analyzer, <sup>k</sup>Taken from Indycwaterpros,<sup>30</sup> <sup>l</sup>Taken from Crux,<sup>17</sup> <sup>m</sup>Taken from EPA,<sup>18</sup> <sup>n</sup>Taken from DOE<sup>19</sup>

**Table S6.** Emission Factors of carbon footprint analysis

|                                                                                                                                      |         |
|--------------------------------------------------------------------------------------------------------------------------------------|---------|
| Biomass (poplar) soil organic carbon (SOC) (kg CO <sub>2</sub> e per kg) <sup>a</sup>                                                | -0.1250 |
| Biomass (poplar) farming (CH <sub>4</sub> +N <sub>2</sub> O emissions) and transportation (kg CO <sub>2</sub> e per kg) <sup>b</sup> | 0.0748  |
| Catalyst (5 wt% Pd/C) (kg CO <sub>2</sub> e per kg) <sup>b</sup>                                                                     | 12.044  |
| Hydrogen (kg CO <sub>2</sub> e per kg) <sup>b</sup>                                                                                  | 9.3227  |
| Methanol (kg CO <sub>2</sub> e per kg) <sup>b</sup>                                                                                  | 0.4640  |
| Ash disposal (landfill) (kg CO <sub>2</sub> e per kg) <sup>b</sup>                                                                   | 0.0589  |
| FGD lime (kg CO <sub>2</sub> e per kg) <sup>b</sup>                                                                                  | 0.0385  |
| Fresh water (kg CO <sub>2</sub> e per kg) <sup>b</sup>                                                                               | 0.0063  |
| Glucose (kg CO <sub>2</sub> e per kg) <sup>b</sup>                                                                                   | 0.7482  |
| Disodium phosphate (kg CO <sub>2</sub> e per kg) <sup>b</sup>                                                                        | 1.4503  |
| Monopotassium phosphate (kg CO <sub>2</sub> e per kg) <sup>b</sup>                                                                   | 1.9002  |
| Ammonium Sulfate (kg CO <sub>2</sub> e per kg) <sup>b</sup>                                                                          | 0.4831  |
| NaCl (kg CO <sub>2</sub> e per kg) <sup>b</sup>                                                                                      | 0.2587  |
| Corn steep liquor (kg CO <sub>2</sub> e per kg) <sup>b</sup>                                                                         | 1.6095  |
| Caustic (NaOH) (kg CO <sub>2</sub> e per kg) <sup>b</sup>                                                                            | 1.9661  |
| Electricity (average US electricity grid, kg CO <sub>2</sub> e per kWh) <sup>b</sup>                                                 | 0.3637  |
| Cellulase enzyme (kg CO <sub>2</sub> e per kg) <sup>b</sup>                                                                          | 2.0816  |
| Electricity (coal power plant, kg CO <sub>2</sub> e per kWh) <sup>b</sup>                                                            | 1.0492  |
| Electricity (natural gas power plant, kg CO <sub>2</sub> e per kWh) <sup>b</sup>                                                     | 0.4507  |
| Electricity (residual oil power plant, kg CO <sub>2</sub> e per kWh) <sup>b</sup>                                                    | 0.9594  |
| Gasoline (kg CO <sub>2</sub> e per kg) <sup>b</sup>                                                                                  | 0.7028  |
| Natural Gas as fuel (kg CO <sub>2</sub> e per kg) <sup>b</sup>                                                                       | 0.3238  |

<sup>a</sup>Taken from Gelfand et al.,<sup>32</sup> <sup>b</sup>Taken from Wang et al.<sup>31</sup>

Note: The reported emissions in Argonne GREET<sup>40</sup> (g species [CO<sub>2</sub>, N<sub>2</sub>O, CH<sub>4</sub>] per shot ton) were converted to kgCO<sub>2</sub>e per kg by applying a 100-year global warming potential (CO<sub>2</sub> = 1; N<sub>2</sub>O = 273; CH<sub>4</sub> = 30) and then using the conversion factor: kgCO<sub>2</sub>e per kg = 1.10231 × 10<sup>-6</sup> gCO<sub>2</sub>e per shot ton.
